# Supplementary material for: Nostril-specific and structure-based olfactory learning of chiral discrimination in human adults
Source: eLife. 2019 Jan 17;8:e41296. doi: 10.7554/eLife.41296 (PMC6336403; doi:10.7554/eLife.41296)
Supplement: Figure 1—source data 1. [file elife-41296-fig1-data1.xlsx]

## Sheet: Discrimination accuracy
Num	Name	Gender	Age	TrainedOdor	TrainedNostril	TraOdor.TraNos.Pre	TraOdor.TraNos.Post	TraOdor.UnTraNos.Pre	TraOdor.UnTraNos.Post	ConOdor.TraNos.Pre	ConOdor.TraNos.Post	ConOdor.UnTraNos.Pre	ConOdor.UnTraNos.Post
1	TMM	Female	28	α-Pinene	Right	0.5556	0.8889	0.3333	0.5556	0.5556	0.2222	0.4444	0.4444
2	QY	Female	24	α-Pinene	Left	0.1111	0.7778	0.3333	0.4444	0.2222	0.5556	0.3333	0.2222
3	LX	Female	28	α-Pinene	Right	0.3333	0.4444	0.4444	0.1111	0.4444	0.4444	0.2222	0.4444
4	FCQ	Male	24	α-Pinene	Right	0.3333	0.7778	0.5556	0.6667	0.4444	0.5556	0.3333	0.6667
5	WLY	Male	27	α-Pinene	Right	0.5556	0.7778	0.2222	0.4444	0.4444	0.4444	0.3333	0.4444
6	YZX	Female	22	α-Pinene	Left	0.5556	0.6667	0.2222	0.3333	0.4444	0.2222	0.2222	0.2222
7	YYX	Male	23	2-Butonal	Right	0.3333	0.5556	0.4444	0.3333	0.4444	0.5556	0.2222	0.5556
8	YXX	Male	25	2-Butonal	Left	0.3333	0.7778	0.5556	0.3333	0.3333	0.5556	0.4444	0.2222
9	WW	Male	22	2-Butonal	Right	0.2222	0.6667	0.3333	0.2222	0.4444	0.5556	0.4444	0.2222
10	ZX	Male	25	2-Butonal	Right	0.2222	0.7778	0.2222	0.3333	0.1111	0.4444	0.3333	0.4444
11	LJ	Female	25	2-Butonal	Left	0.2222	0.6667	0.3333	0.3333	0.4444	0.4444	0.5556	0.4444
12	XS	Female	24	2-Butonal	Left	0.5556	0.6667	0.3333	0.5556	0.4444	0.2222	0.4444	0.5556
	TraOdor	Training pair of odor enantiomers
	ConOdor	Control pair of odor enantiomers
	TraNos	Trained nostril
	UnTraNos	Untrained nostril
	Pre	Pretest
	Post	Posttest
