# Supplementary material for: Nostril-specific and structure-based olfactory learning of chiral discrimination in human adults
Source: eLife. 2019 Jan 17;8:e41296. doi: 10.7554/eLife.41296 (PMC6336403; doi:10.7554/eLife.41296)
Supplement: Figure 2—source data 1. [file elife-41296-fig2-data1.xlsx]

## Sheet: Discrimination accuracy
Num	Name	Gender	Age	TrainedOdor	TrainedNostril	TraOdor.TraNos.Pre	TraOdor.TraNos.Post	TraOdor.UnTraNos.Pre	TraOdor.UnTraNos.Post	SsOdor.TraNos.Pre	SsOdor.TraNos.Post	SsOdor.UnTraNos.Pre	SsOdor.UnTraNos.Post	SdOdor.TraNos.Pre	SdOdor.TraNos.Post	SdOdor.UnTraNos.Pre	SdOdor.UnTraNos.Post
1	WZD	Female	21	carvone	Right	0.3333	0.5556	0.5556	0.6667	0.4444	0.7778	0.3333	0.4444	0.3333	0.5556	0.3333	0.4444
2	ZML	Female	24	carvone	Left	0.2222	0.5556	0.2222	0.4444	0.4444	0.5556	0.3333	0.4444	0.2222	0.2222	0.3333	0.2222
3	MDL	Male	24	limonene	Left	0.2222	0.7778	0.3333	0.3333	0.2222	0.6667	0.3333	0.2222	0.3333	0.4444	0.2222	0.2222
4	HWT	Male	24	limonene	Right	0.3333	0.6667	0.4444	0.4444	0.5556	0.7778	0.4444	0.5556	0.5556	0.4444	0.3333	0.4444
5	ZSQ	Female	18	carvone	Right	0.5556	0.7778	0.4444	0.3333	0.4444	0.5556	0.4444	0.3333	0.3333	0.3333	0.4444	0.3333
6	LHX	Male	20	limonene	Right	0.4444	0.7778	0.3333	0.5556	0.4444	0.7778	0.4444	0.5556	0.3333	0.7778	0.3333	0.5556
7	DZW	Male	22	limonene	Right	0.4444	0.7778	0.3333	0.4444	0.5556	0.5556	0.4444	0.5556	0.4444	0.3333	0.5556	0.4444
8	PPY	Female	21	carvone	Left	0.2222	0.5556	0.3333	0.4444	0.2222	0.5556	0.3333	0.1111	0.4444	0.4444	0.2222	0.2222
9	CGF	Female	19	carvone	Left	0.4444	0.7778	0.4444	0.5556	0.4444	0.7778	0.3333	0.5556	0.4444	0.4444	0.4444	0.5556
10	YFS	Female	22	carvone	Right	0.4444	0.6667	0.4444	0.2222	0.3333	0.5555	0.3333	0.5555	0.2222	0.2222	0.3333	0.3333
11	HLF	Male	20	limonene	Left	0.3333	0.8889	0.2222	0.5556	0.2222	0.5556	0.2222	0.2222	0.3333	0.2222	0.2222	0.2222
12	LF	Male	20	limonene	Left	0.4444	0.8889	0.3333	0.6667	0.3333	0.6667	0.4444	0.4444	0.5556	0.4444	0.2222	0.3333
			TraOdor	Training pair of odor enantiomers
			SsOdor	Structurally similar enantiomer pair
			SdOdor	Structurally distinct enantiomer pair
			TraNos	Trained nostril
			UnTraNos	Untrained nostril
			Pre	Pretest
			Post	Posttest

## Sheet: Perceived intensity
Num	TrainedOdor	TrainedNostril	TraOdor.TraNos.Pre	TraOdor.TraNos.Post	TraOdor.UnTraNos.Pre	TraOdor.UnTraNos.Post	SsOdor.TraNos.Pre	SsOdor.TraNos.Post	SsOdor.UnTraNos.Pre	SsOdor.UnTraNos.Post	SdOdor.TraNos.Pre	SdOdor.TraNos.Post	SdOdor.UnTraNos.Pre	SdOdor.UnTraNos.Post
1	carvone	Right	6	5	6	6	5	4	5	4	5	6	5	6
2	carvone	Left	4	3	4	4	5	4	5	5	4	5	4	5
3	limonene	Left	4	3	5	5	4	4	4	4	3	3	3	4
4	limonene	Right	5	3	5	5	5	4	5	5	4	5	4	4
5	carvone	Right	5	4	5	5	5	4	5	5	5	5	5	5
6	limonene	Right	5	3	5	5	5	5	5	6	6	6	6	6
7	limonene	Right	4	4	4	5	4	5	4	5	5	6	5	6
8	carvone	Left	5	3	5	4	5	5	5	5	5	4	5	4
9	carvone	Left	4	3	4	3	4	4	5	6	6	6	6	6
10	carvone	Right	4	3	5	5	4	5	5	5	5	5	5	5
11	limonene	Left	4	4	4	5	4	4	4	5	4	4	4	4
12	limonene	Left	4	4	5	5	5	4	4	4	3	4	4	5
